# Supplementary material
Source: Springer Nature journal article supplement (https://www.springermedizin.de/resource/supplementary/12889_2012_4819_MOESM2_ESM.pdf/9490726)

percentage

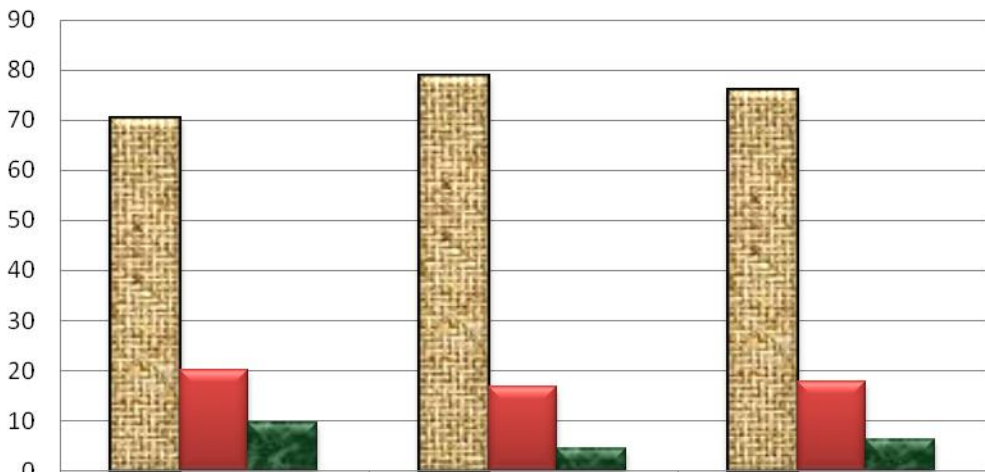

low land

medium land

Total

no trachoma

70.3

78.8

75.9

TF

20.1

16.8

17.9

TI

9.5

4.4

6.2

Supplement: MOESM2 [file 9490726]
